# Supplementary material for: Potassium 6-oxo-7,13,16,22-tetraazatetracyclo[12.6.2.18,12.017,21]tricosa-1(20),8(23),9,11,14,16,18,21-octaen-2-yne-15-carboxylate
Source: Preprints.org preprint supplement (doi:10.20944/preprints202309.0598.v1), 2023-09-11
Supplement: Supplementary file 2 [file supplementary]

## Supporting information

# Synthesis and Anti-Pim-1/2 Kinase Activity of Potassium 6-oxo-7,13,16,22- tetraazatetracyclo[12.6.2.1<sup>8,12</sup>.0<sup>17,21</sup>]tricos- 1(20),8,10,12(23),14(22),15(16),17,18-octaen-2-yne-15- carboxylate

Camille Blouet <sup>1</sup>, Stéphanie Letast <sup>1</sup>, Thomas Robert <sup>2,3</sup>, Stéphane Bach <sup>2,3,4</sup>, Noël Pinaud <sup>5</sup>, Nicolas Joubert <sup>1</sup>, Marie-Claude Viaud-Massuard <sup>1</sup>, Jean Guillon <sup>6</sup>, Cédric Logé <sup>7</sup>, Caroline Denevault-Sabourin <sup>1,\*</sup>.

## Table of content

|                      |    |
|----------------------|----|
| 1. NMR spectra.....  | 3  |
| 2. HRMS spectra..... | 19 |

# 1. NMR spectra

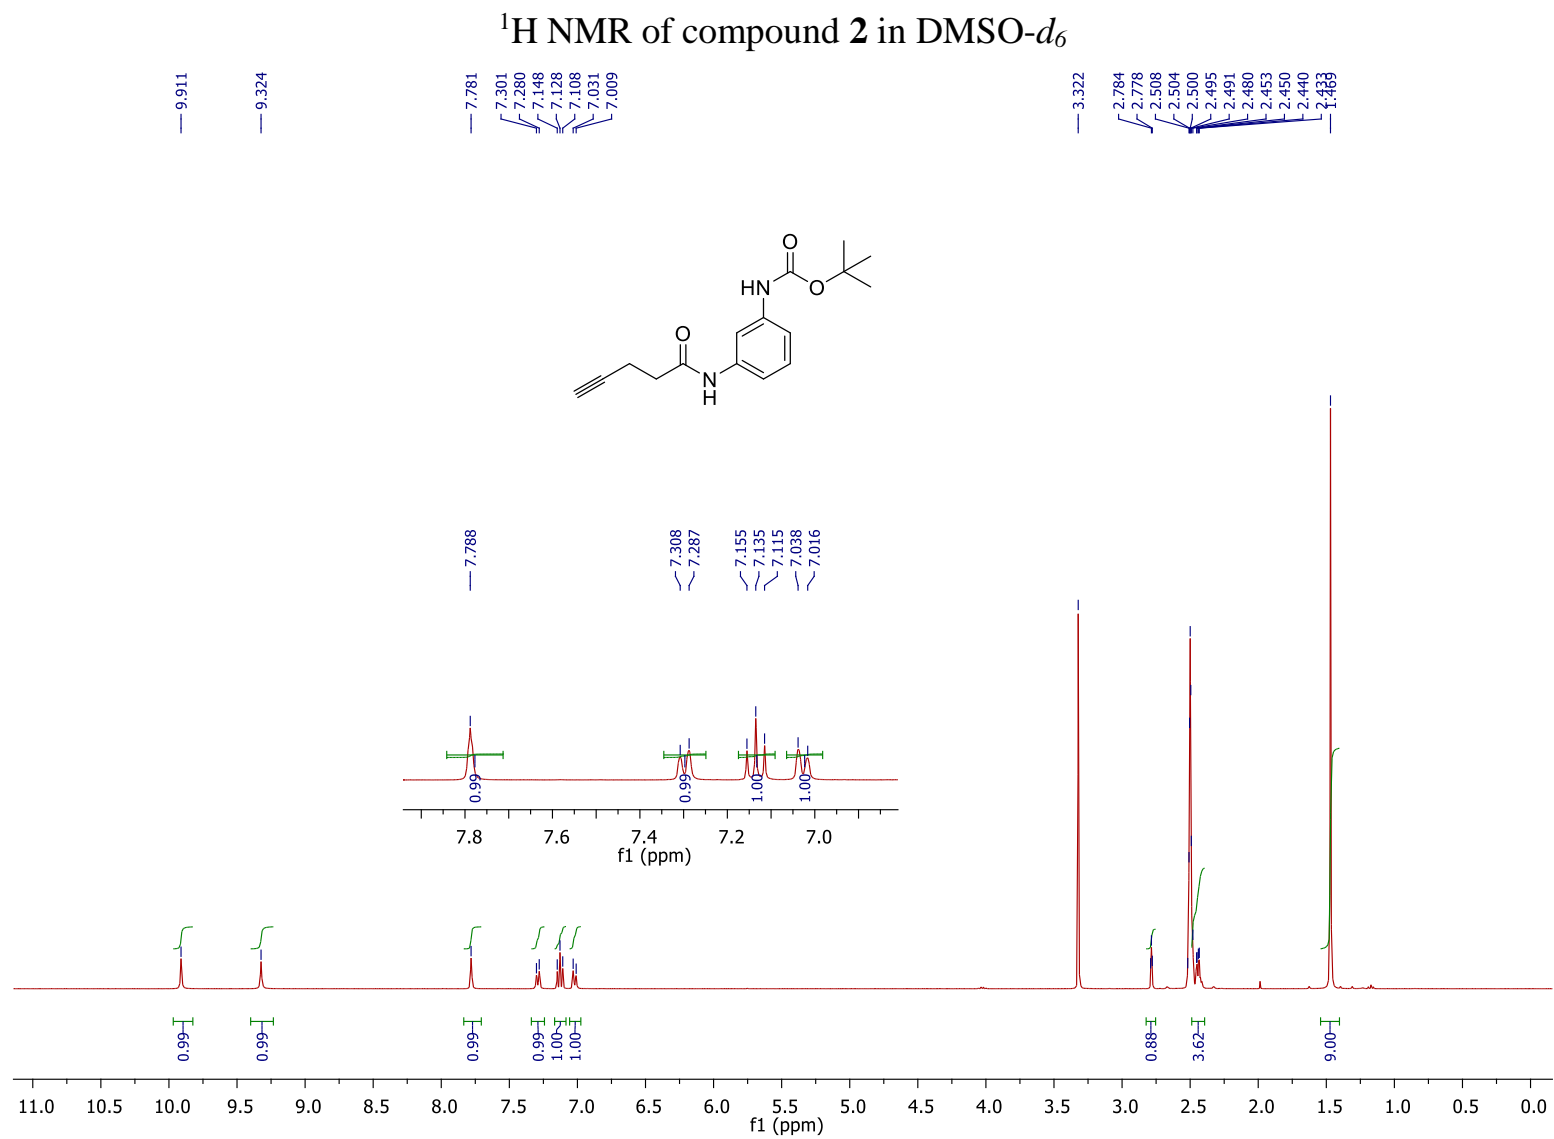

$^{13}\text{C}$  NMR of compound **2** in  $\text{DMSO-}d_6$

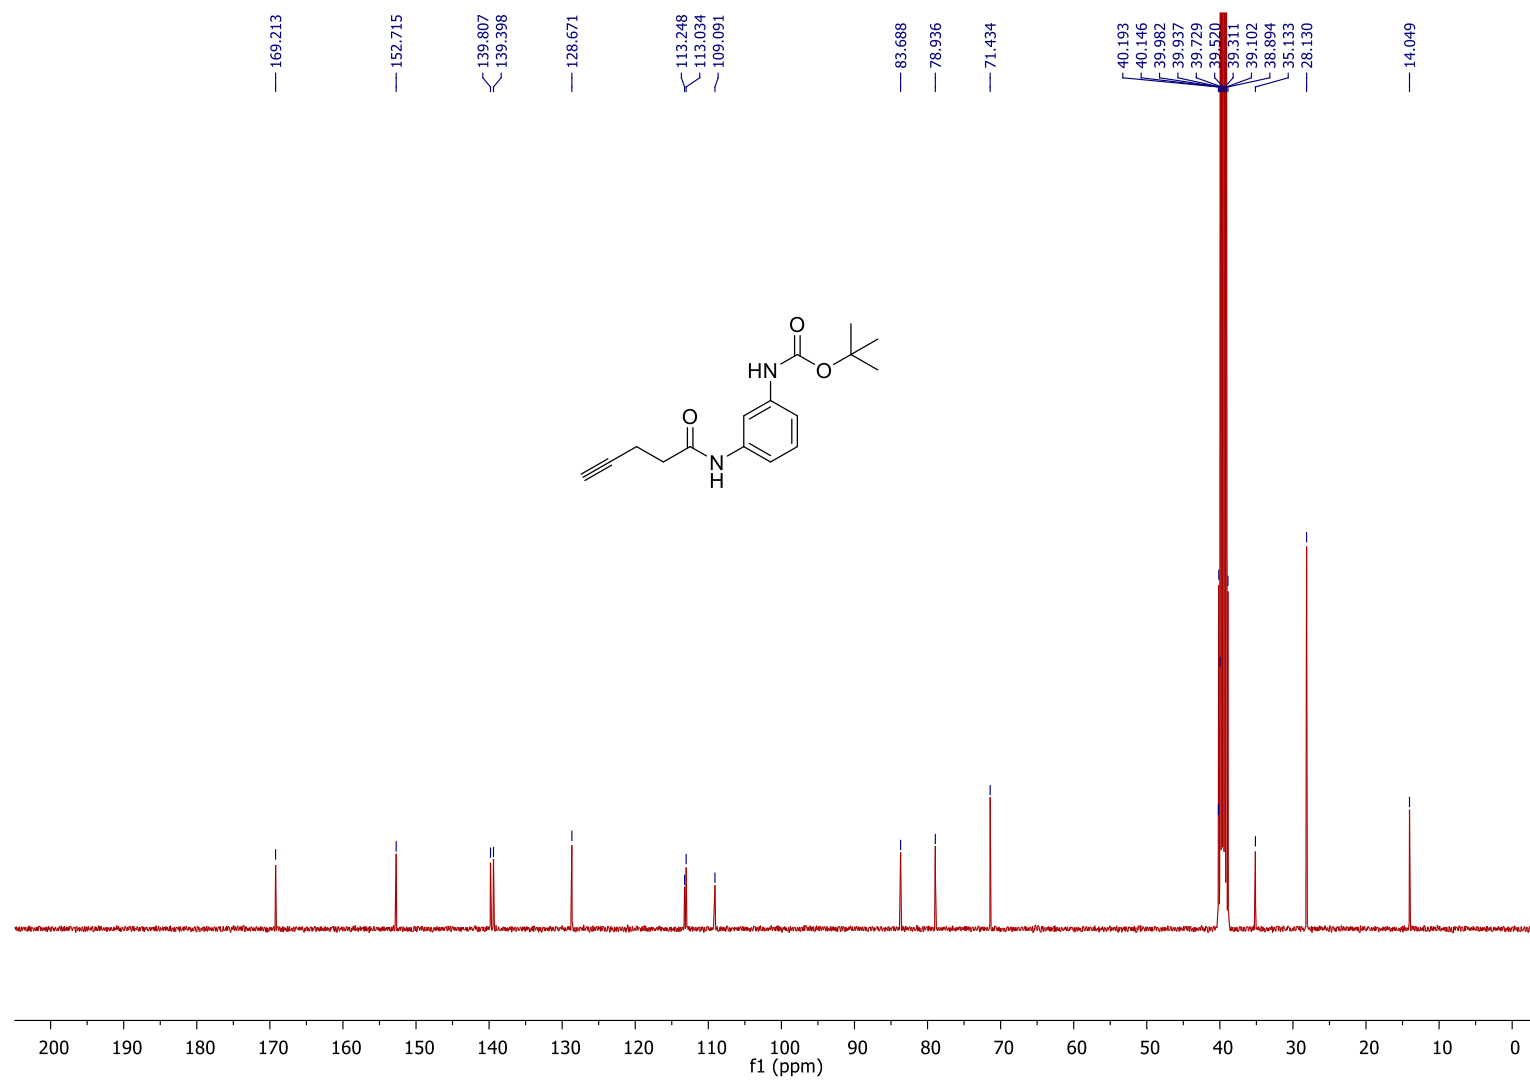

$^1\text{H}$  NMR of compound **3** in  $\text{DMSO-}d_6$

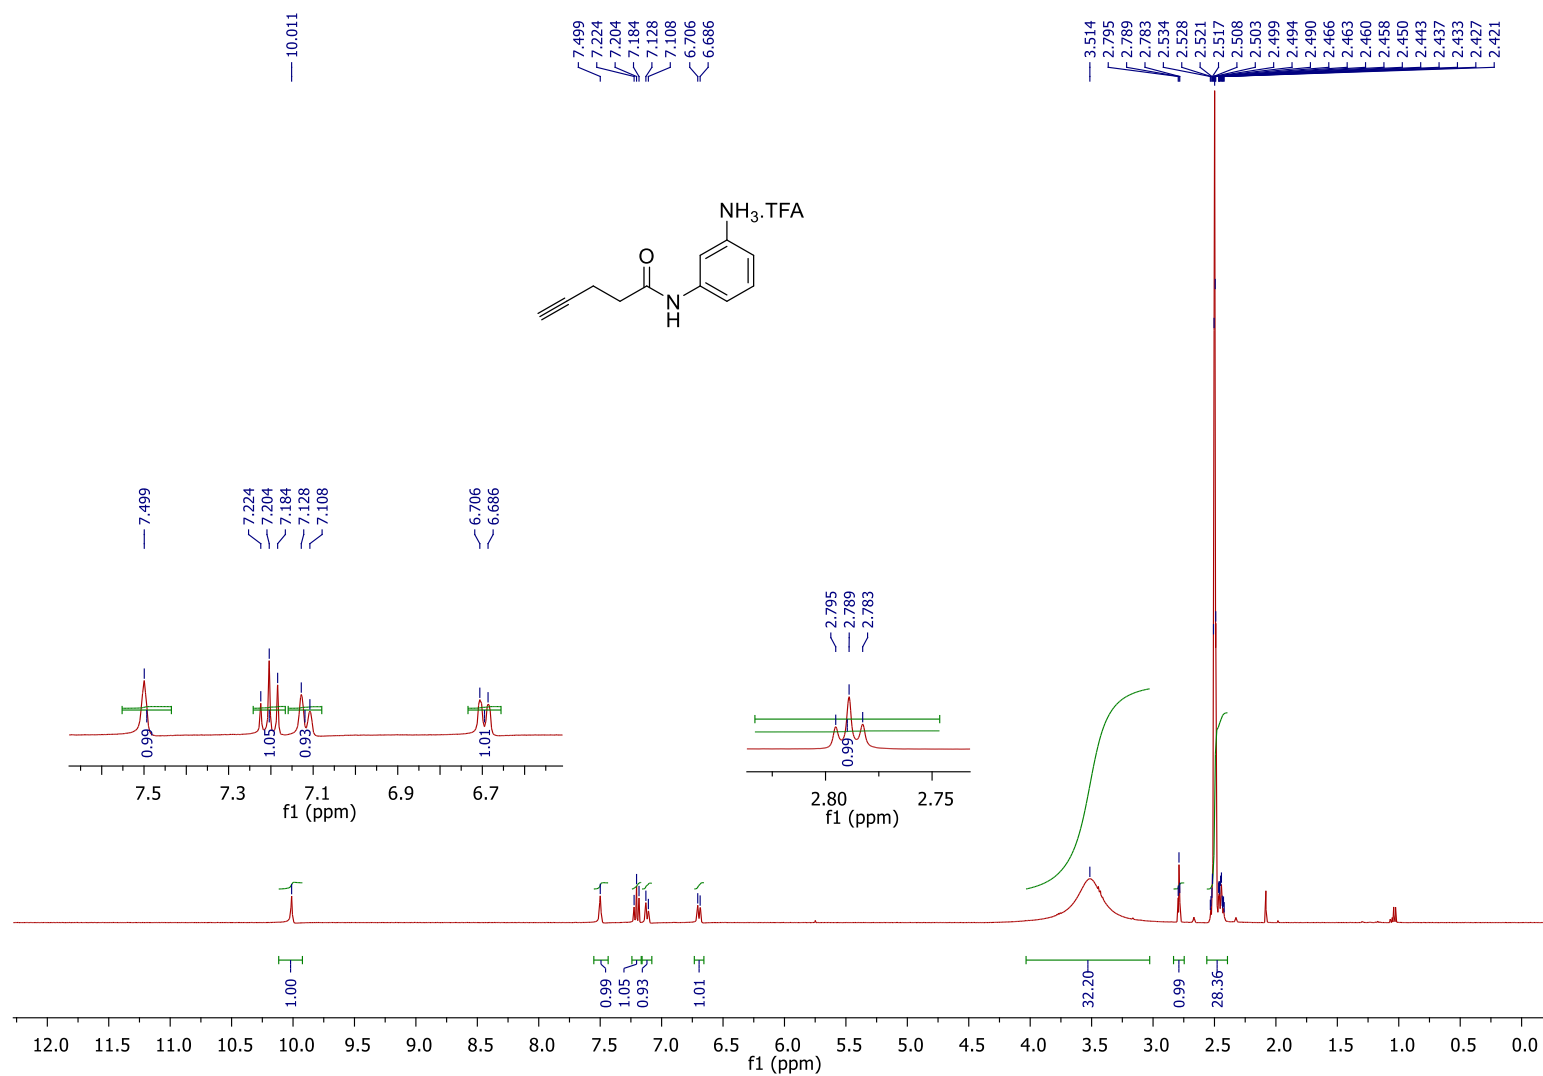

$^{13}\text{C}$  NMR of compound **3** in  $\text{DMSO-}d_6$

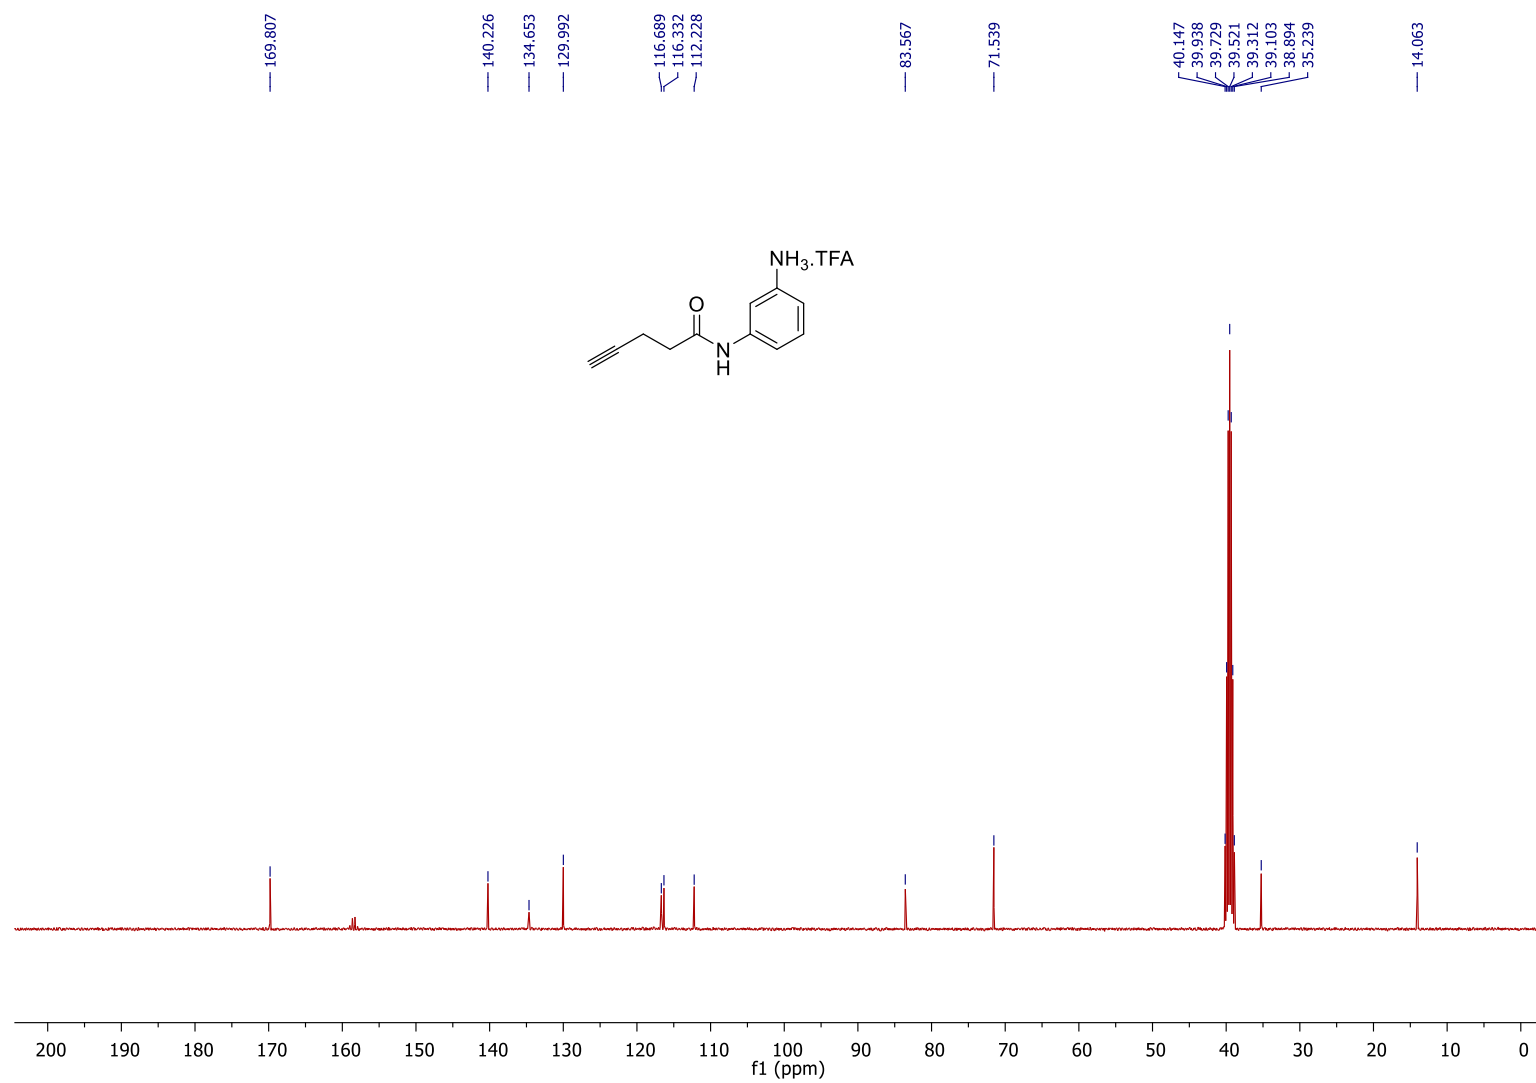

$^{19}\text{F}$  NMR of compound **3** in  $\text{DMSO-}d_6$

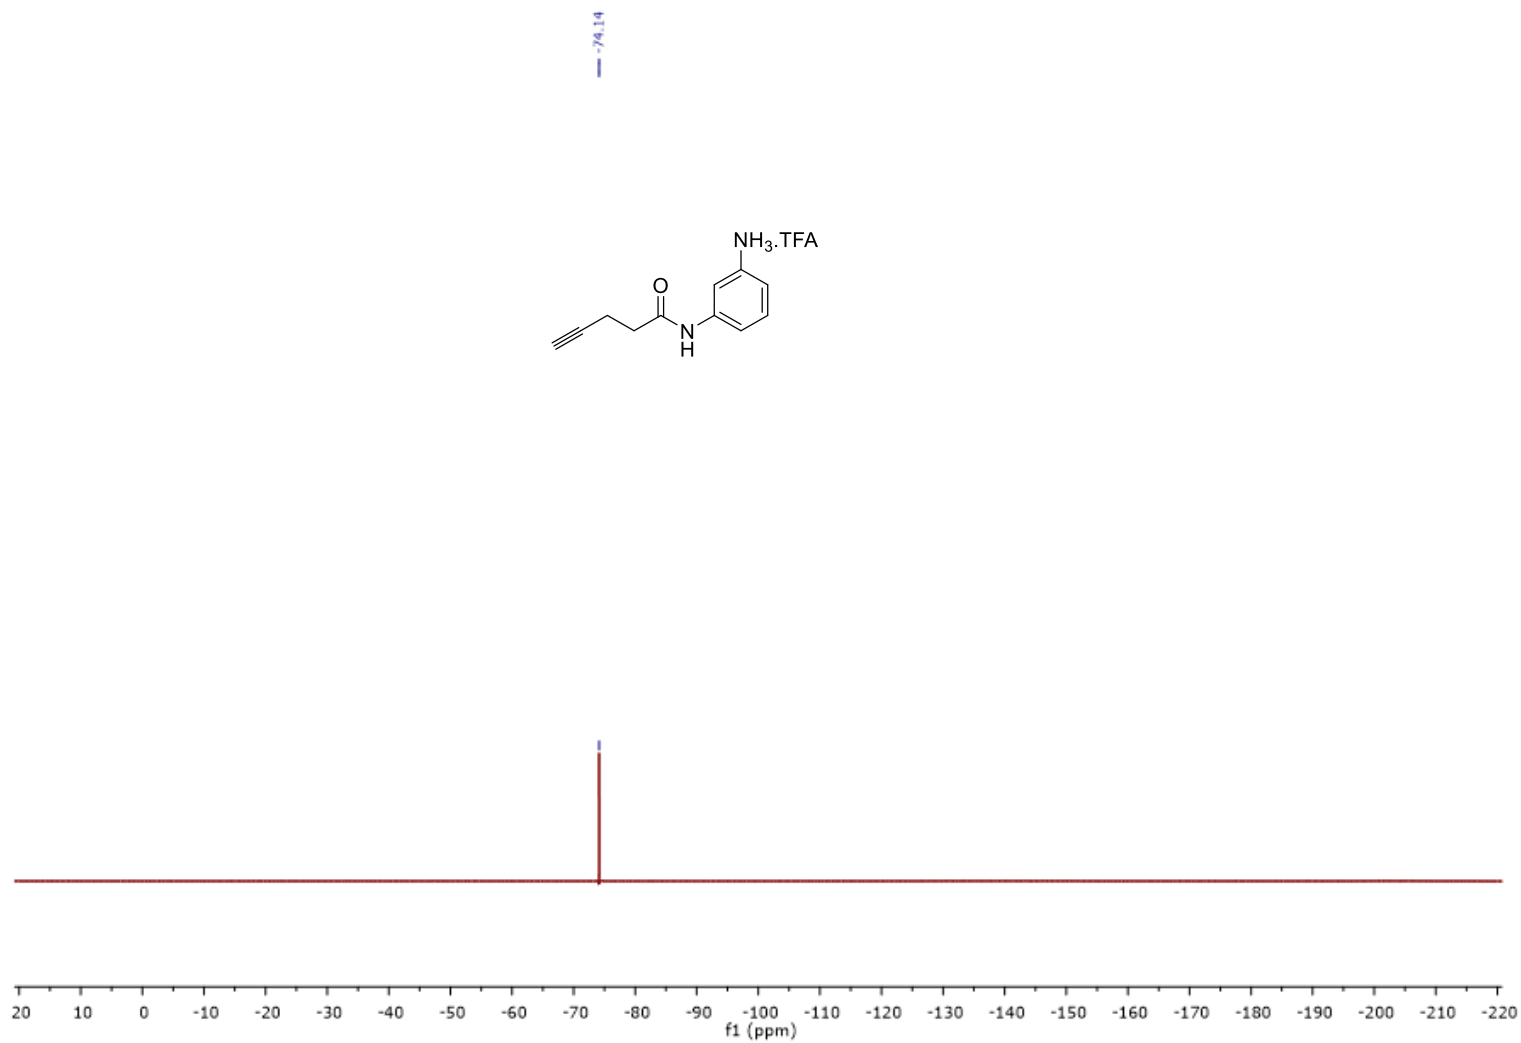

$^1\text{H}$  NMR of compound **4a** in  $\text{DMSO}-d_6$

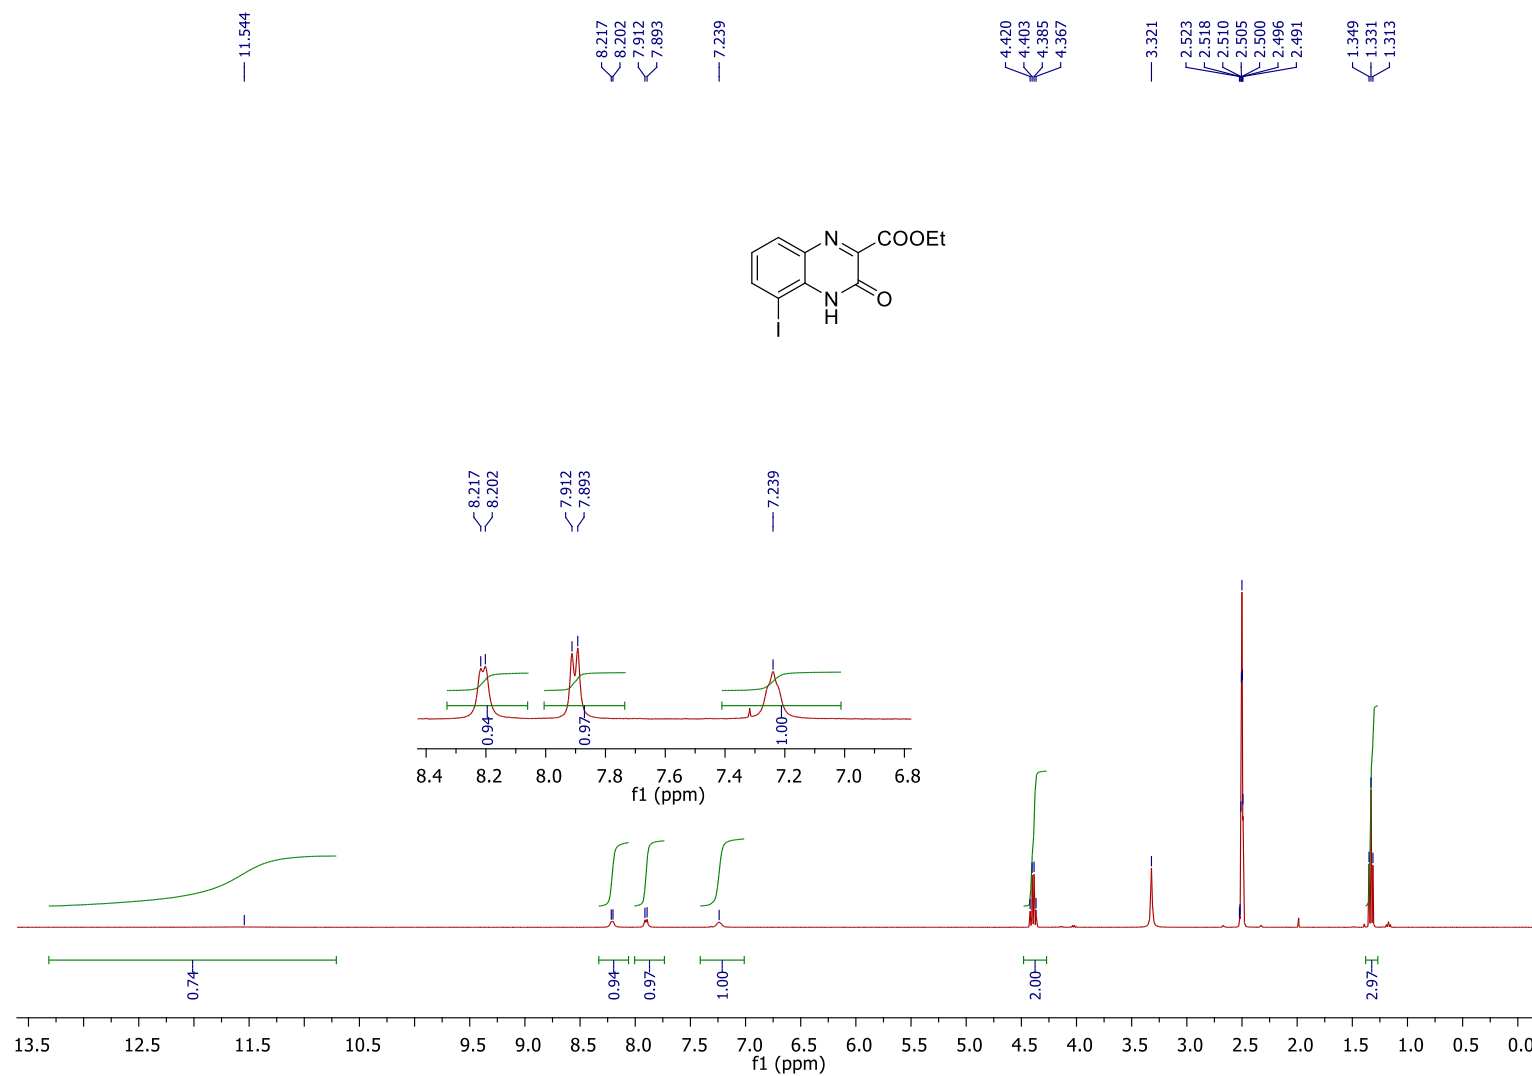



$^1\text{H}$  NMR of compound **4b** in  $\text{DMSO-}d_6$

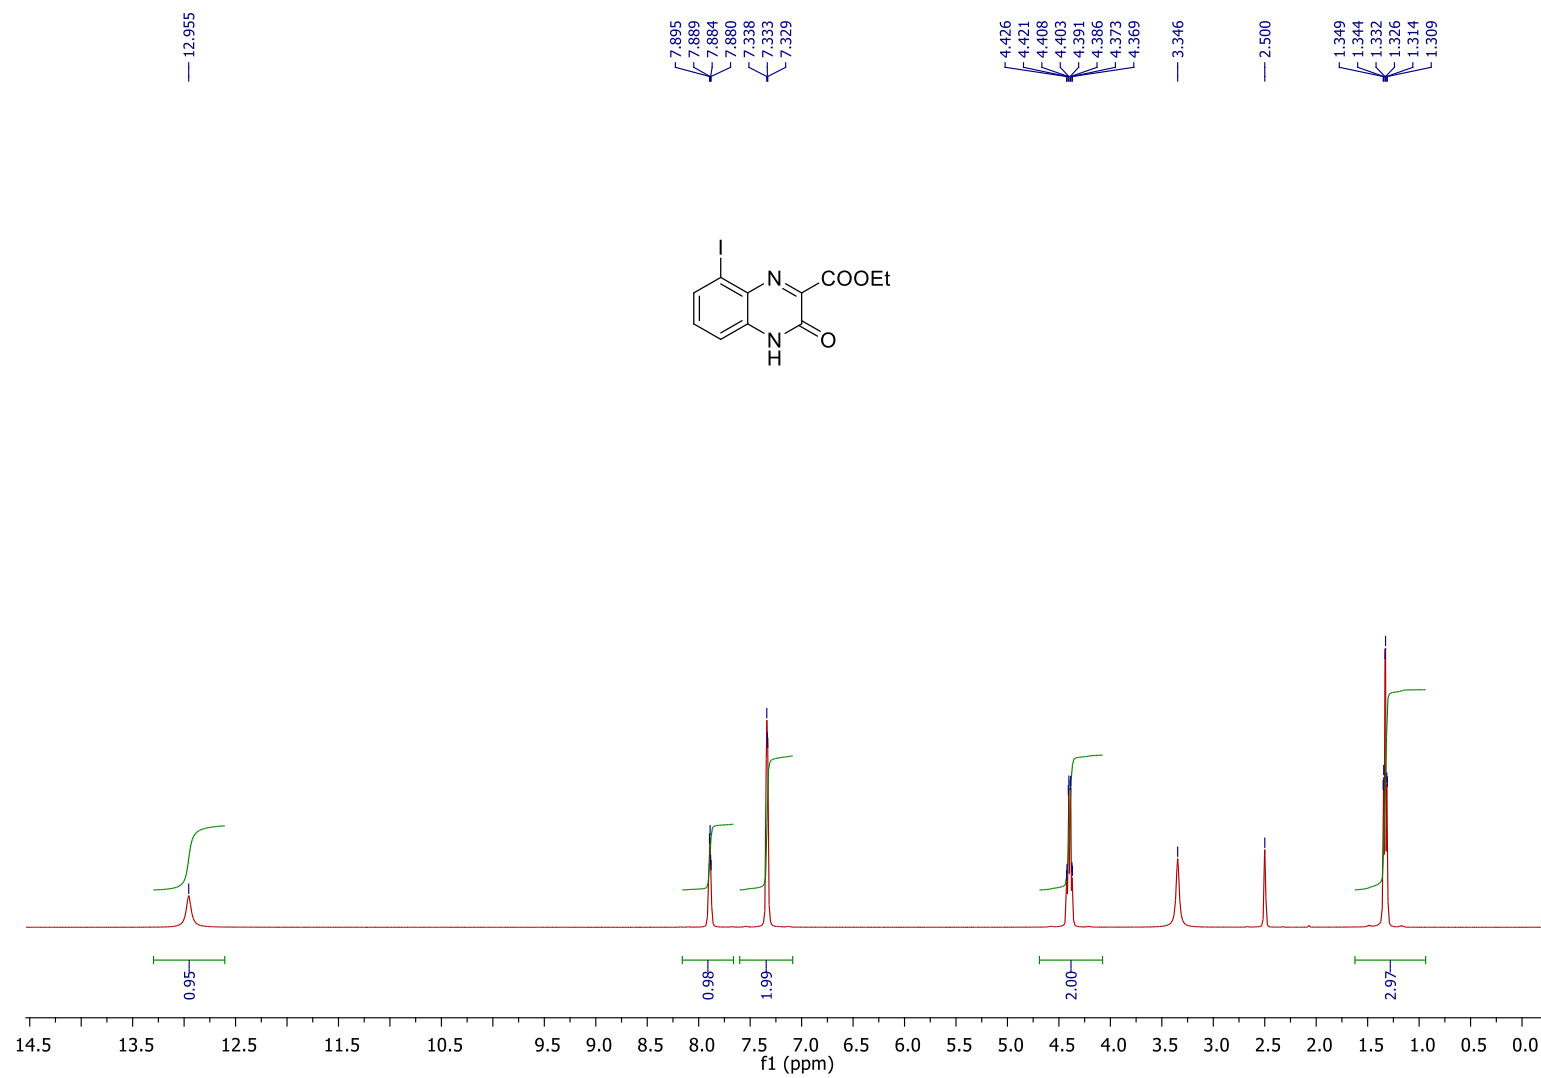

$^1\text{H}$  NMR of compound **5a** in  $\text{DMSO}-d_6$

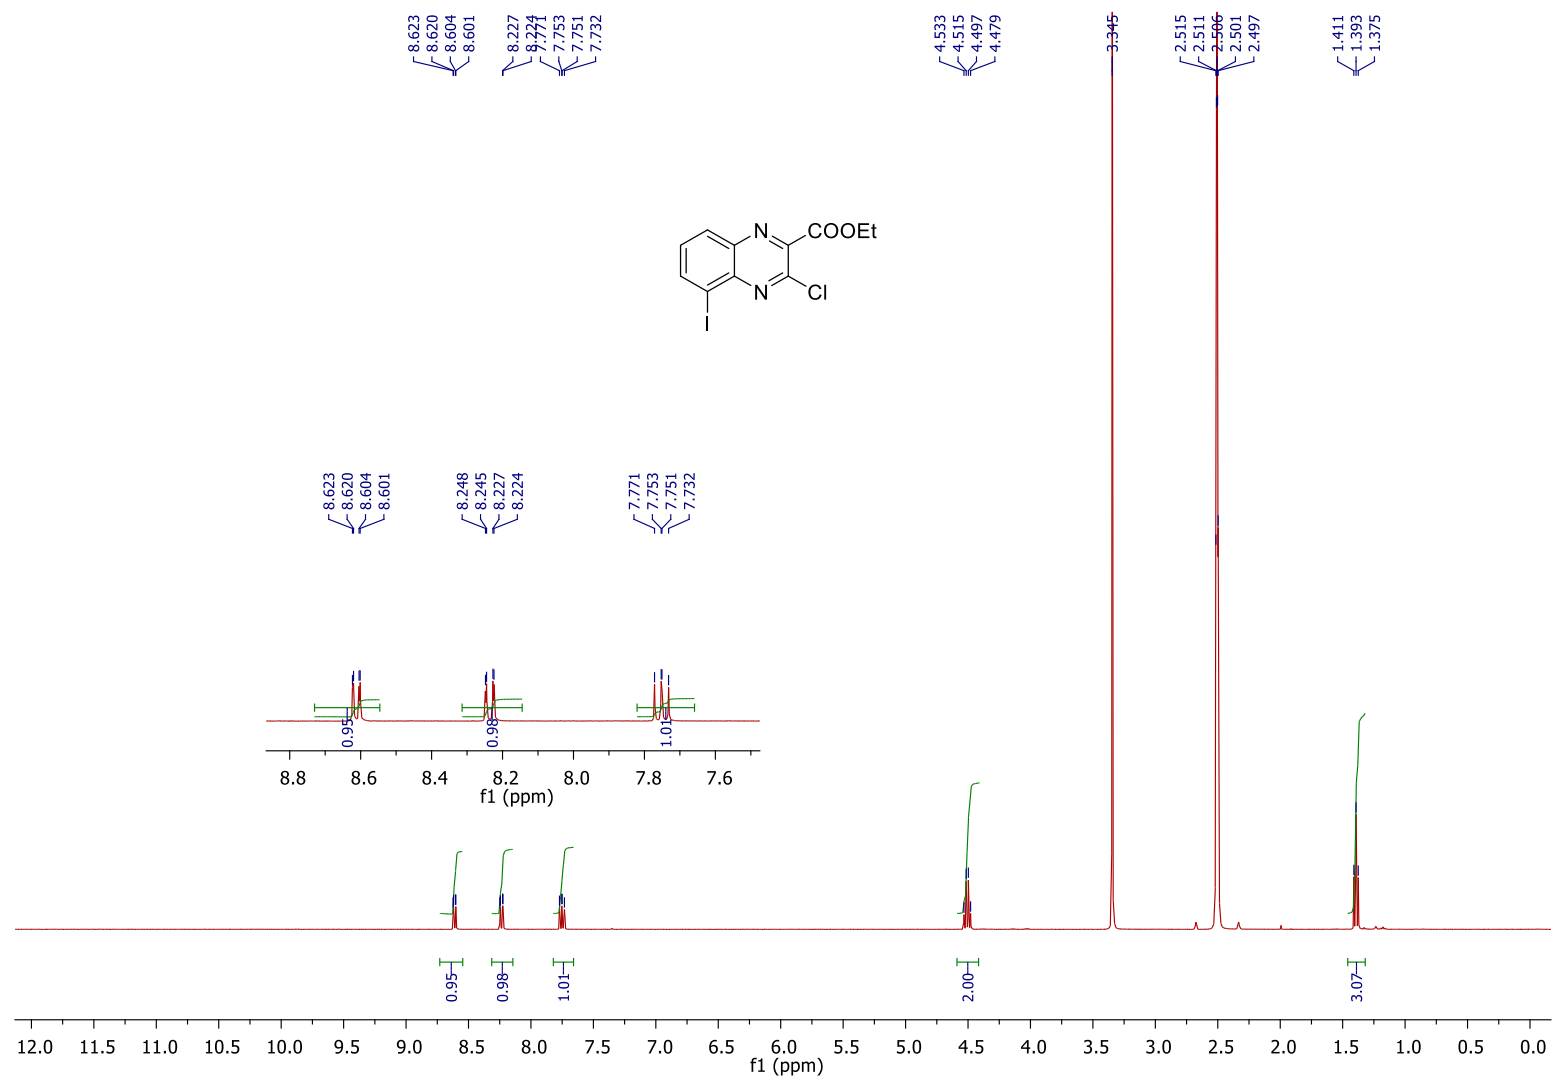

$^{13}\text{C}$  NMR of compound **5a** in  $\text{DMSO-}d_6$

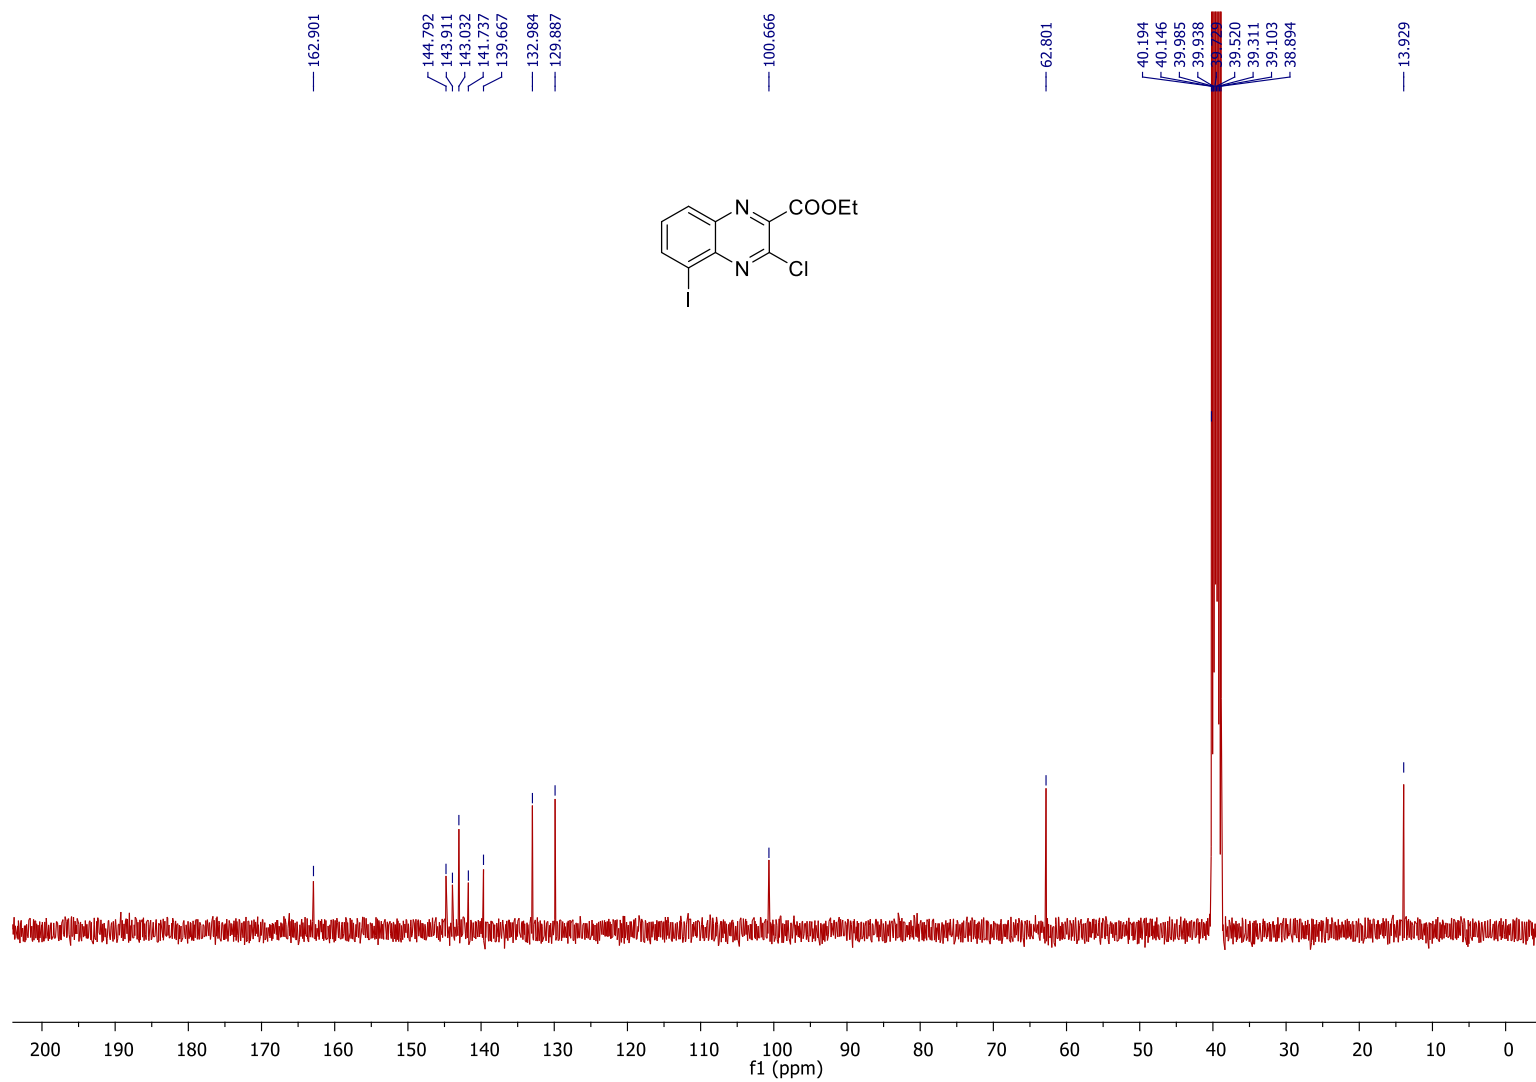

$^1\text{H}$  NMR of compound **5b** in  $\text{DMSO-}d_6$

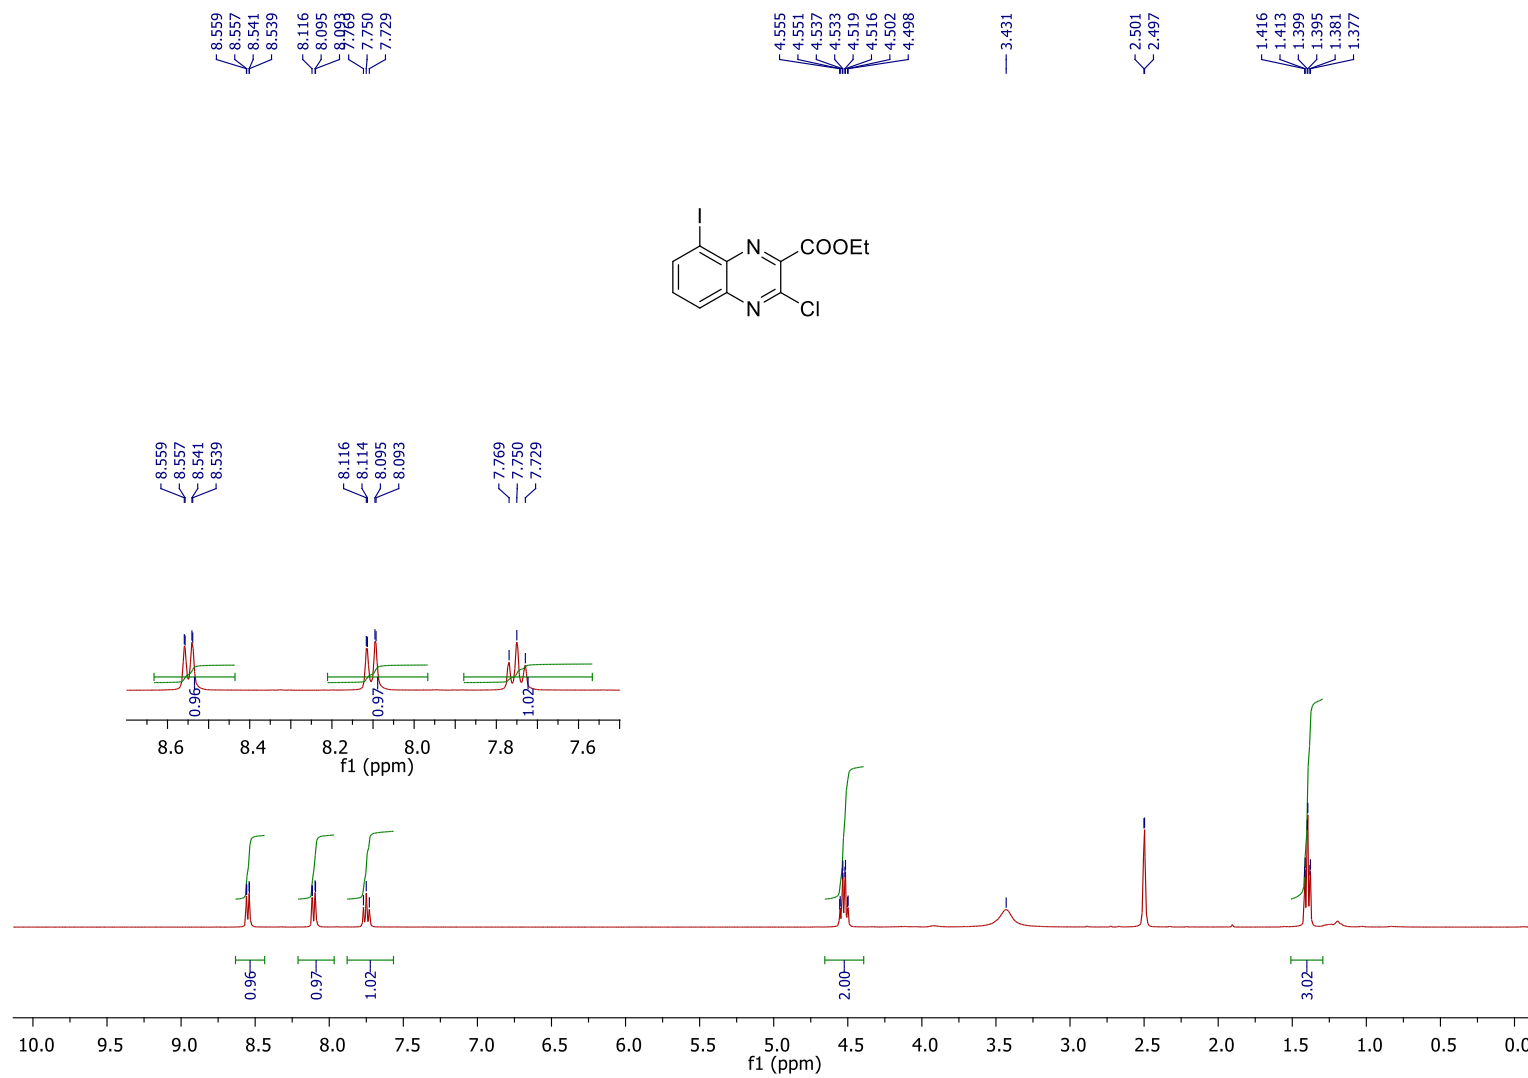

$^{13}\text{C}$  NMR of compound **5b** in  $\text{DMSO-}d_6$

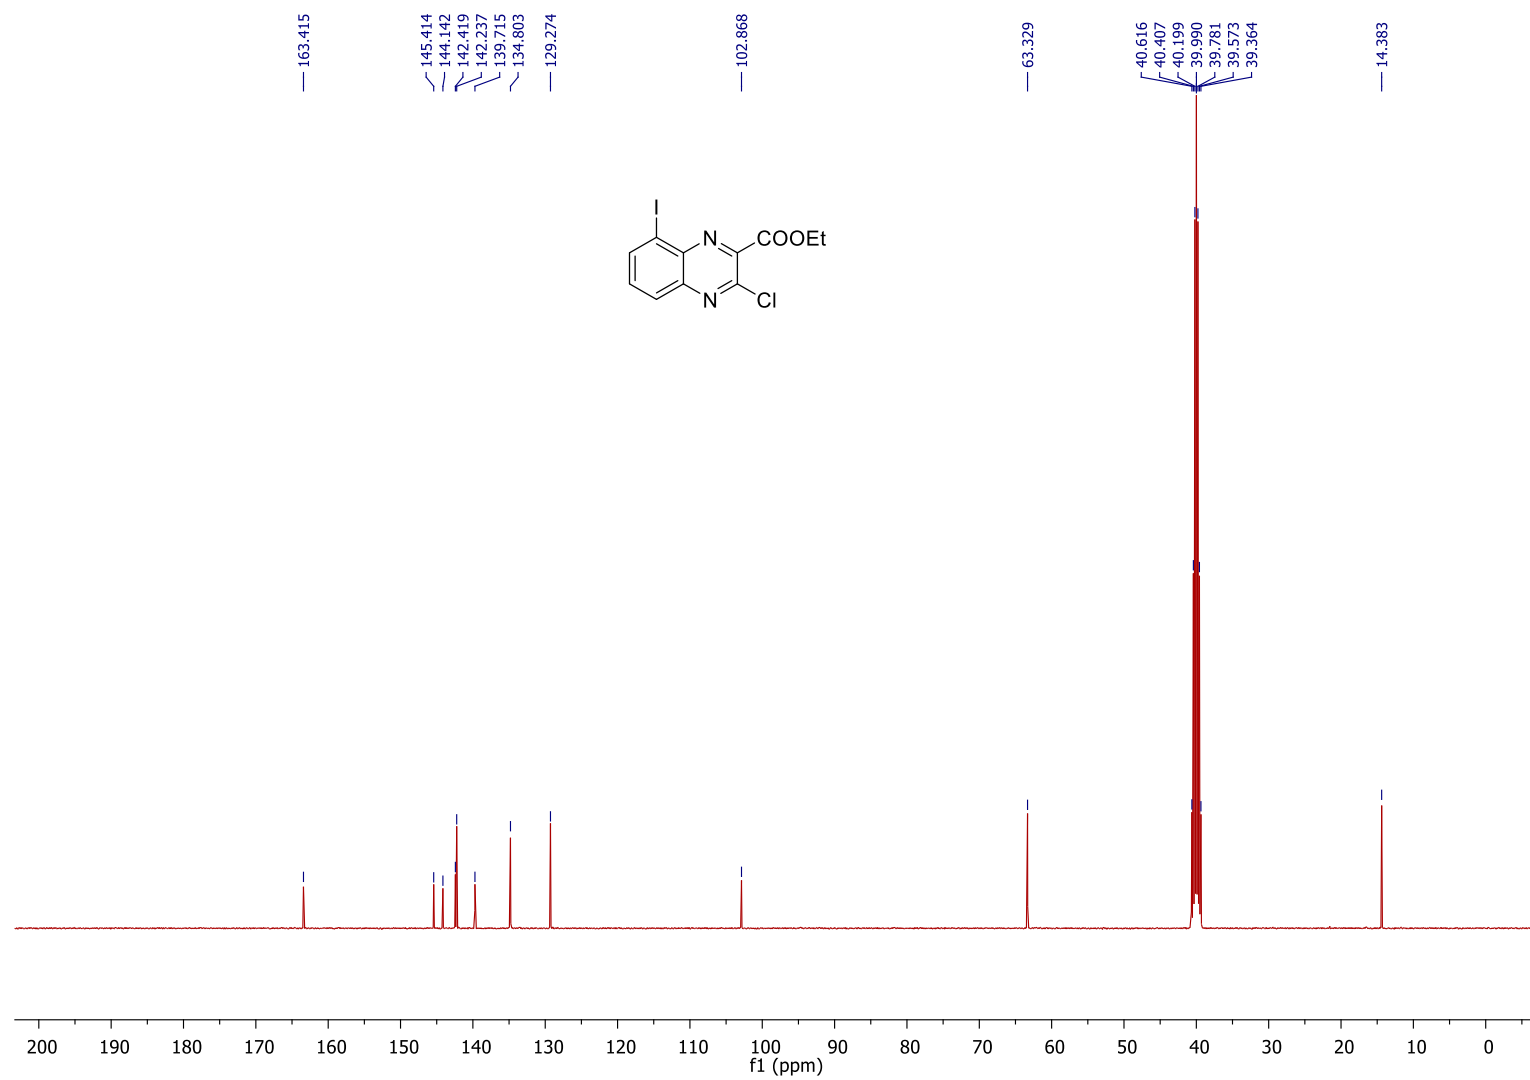

<sup>1</sup>H NMR of compound **6** in DMSO-*d*<sub>6</sub>

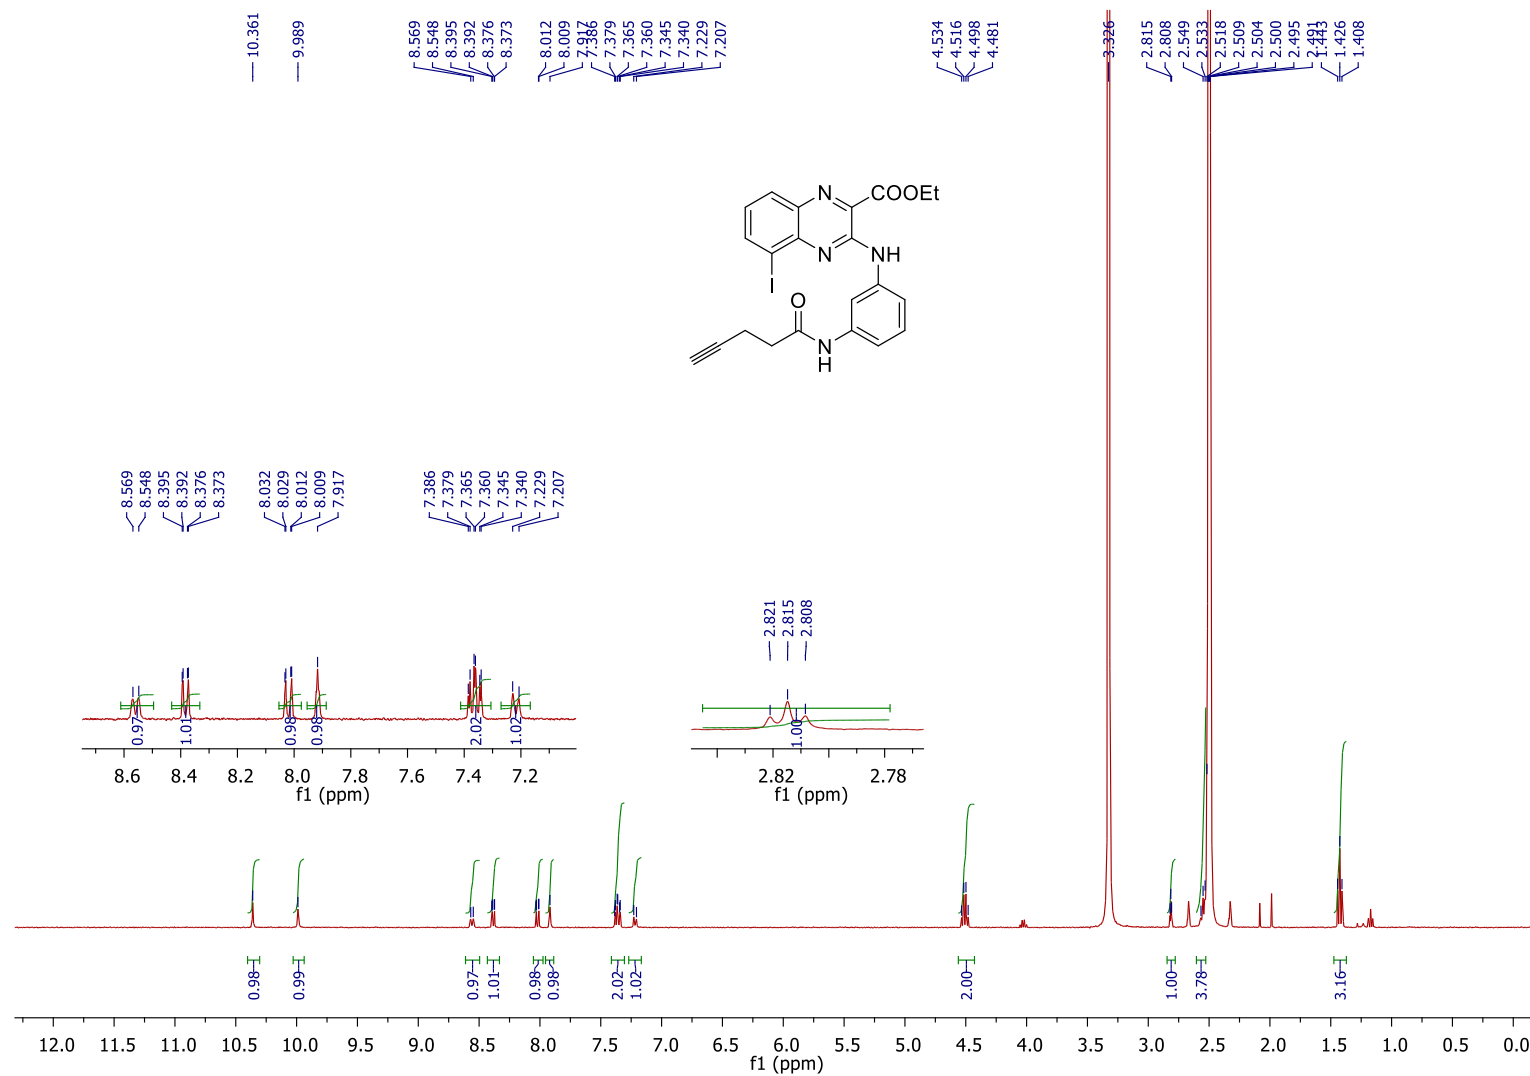

$^{13}\text{C}$  NMR of compound **6** in  $\text{DMSO-}d_6$

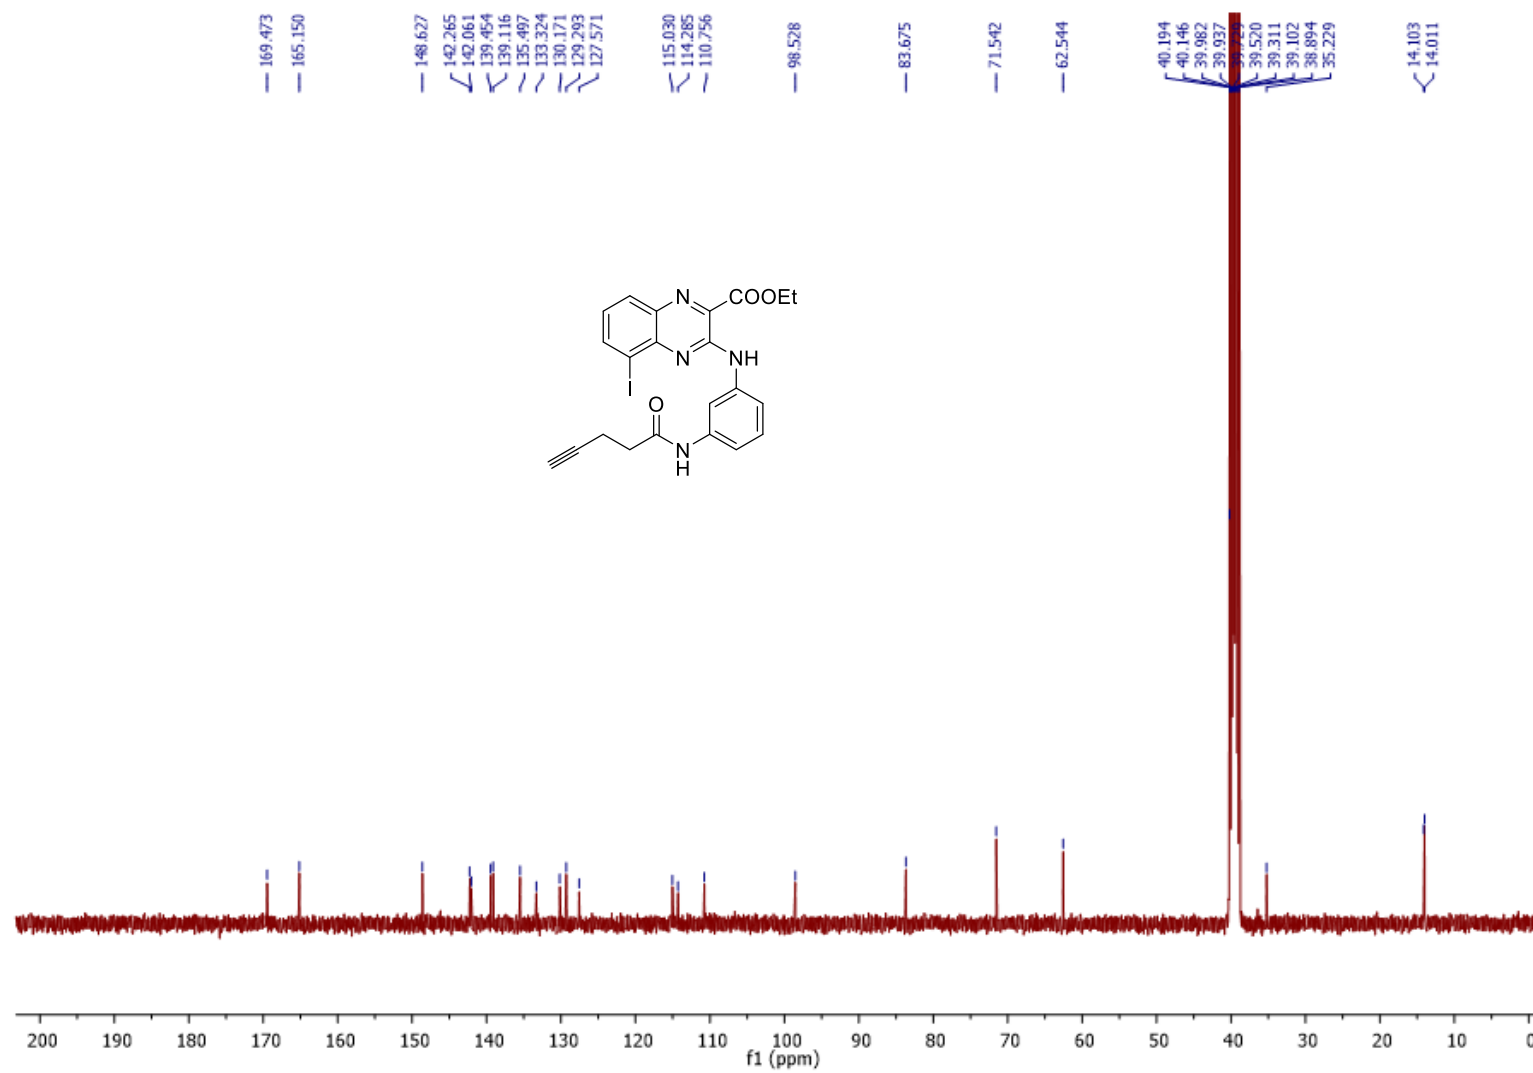

<sup>1</sup>H NMR of compound **7** in DMSO-*d*<sub>6</sub>

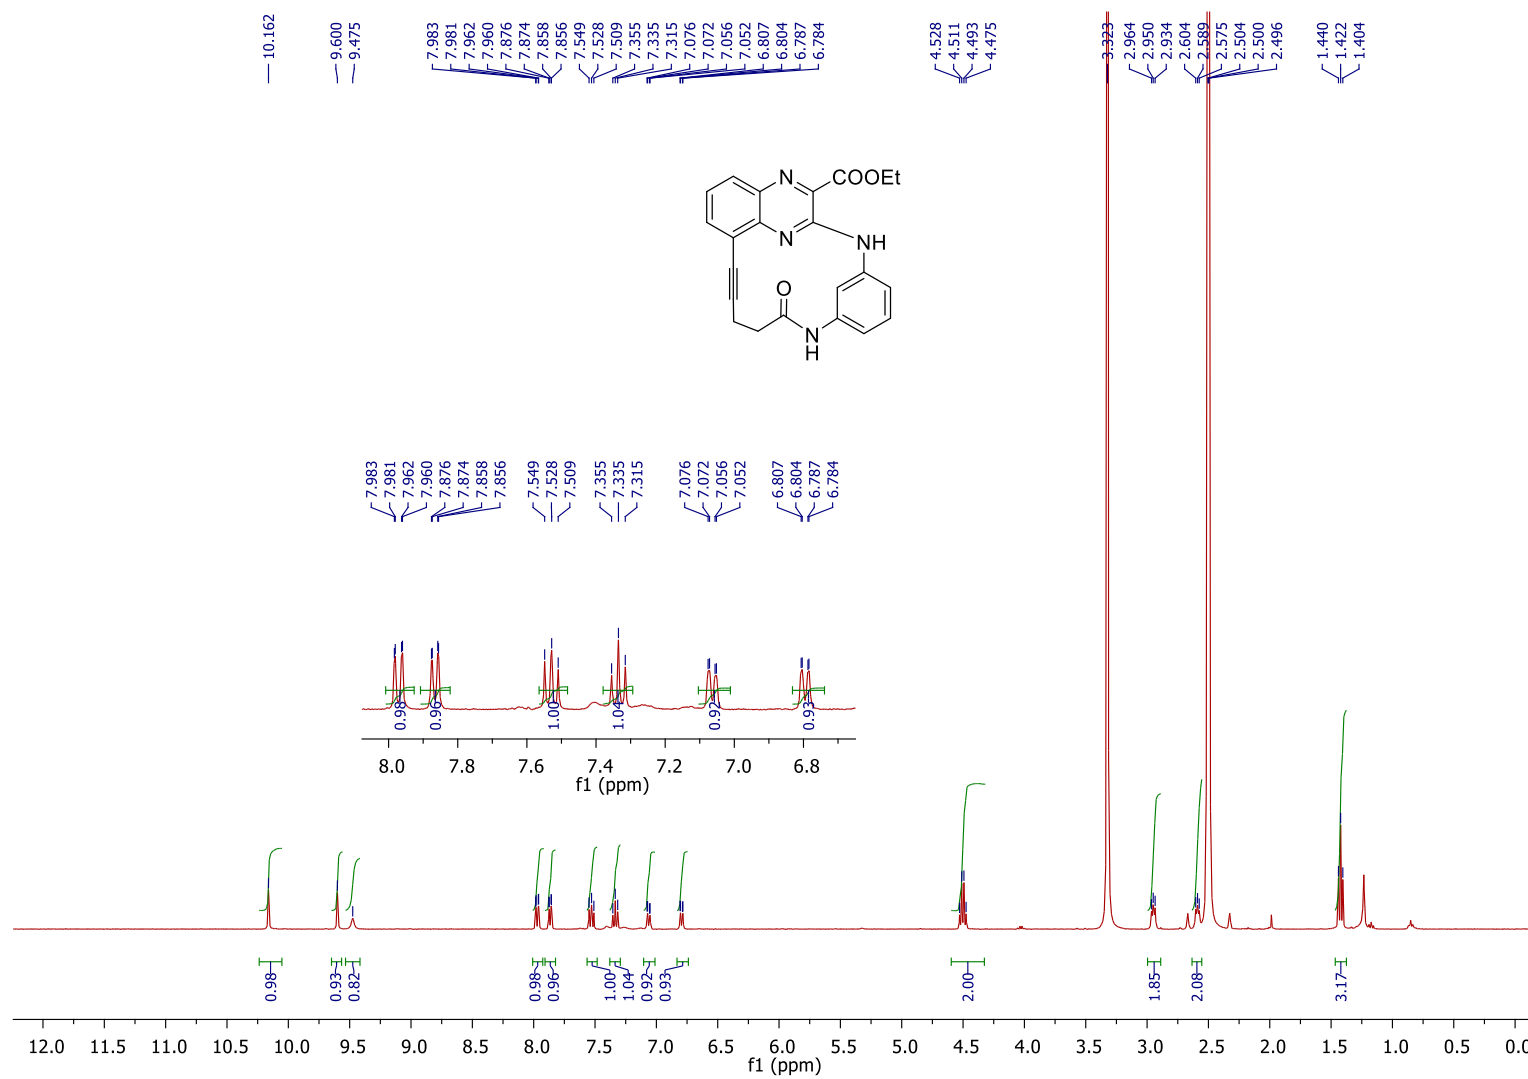



<sup>13</sup>C NMR (JMOD) of compound **7** in DMSO-*d*<sub>6</sub>

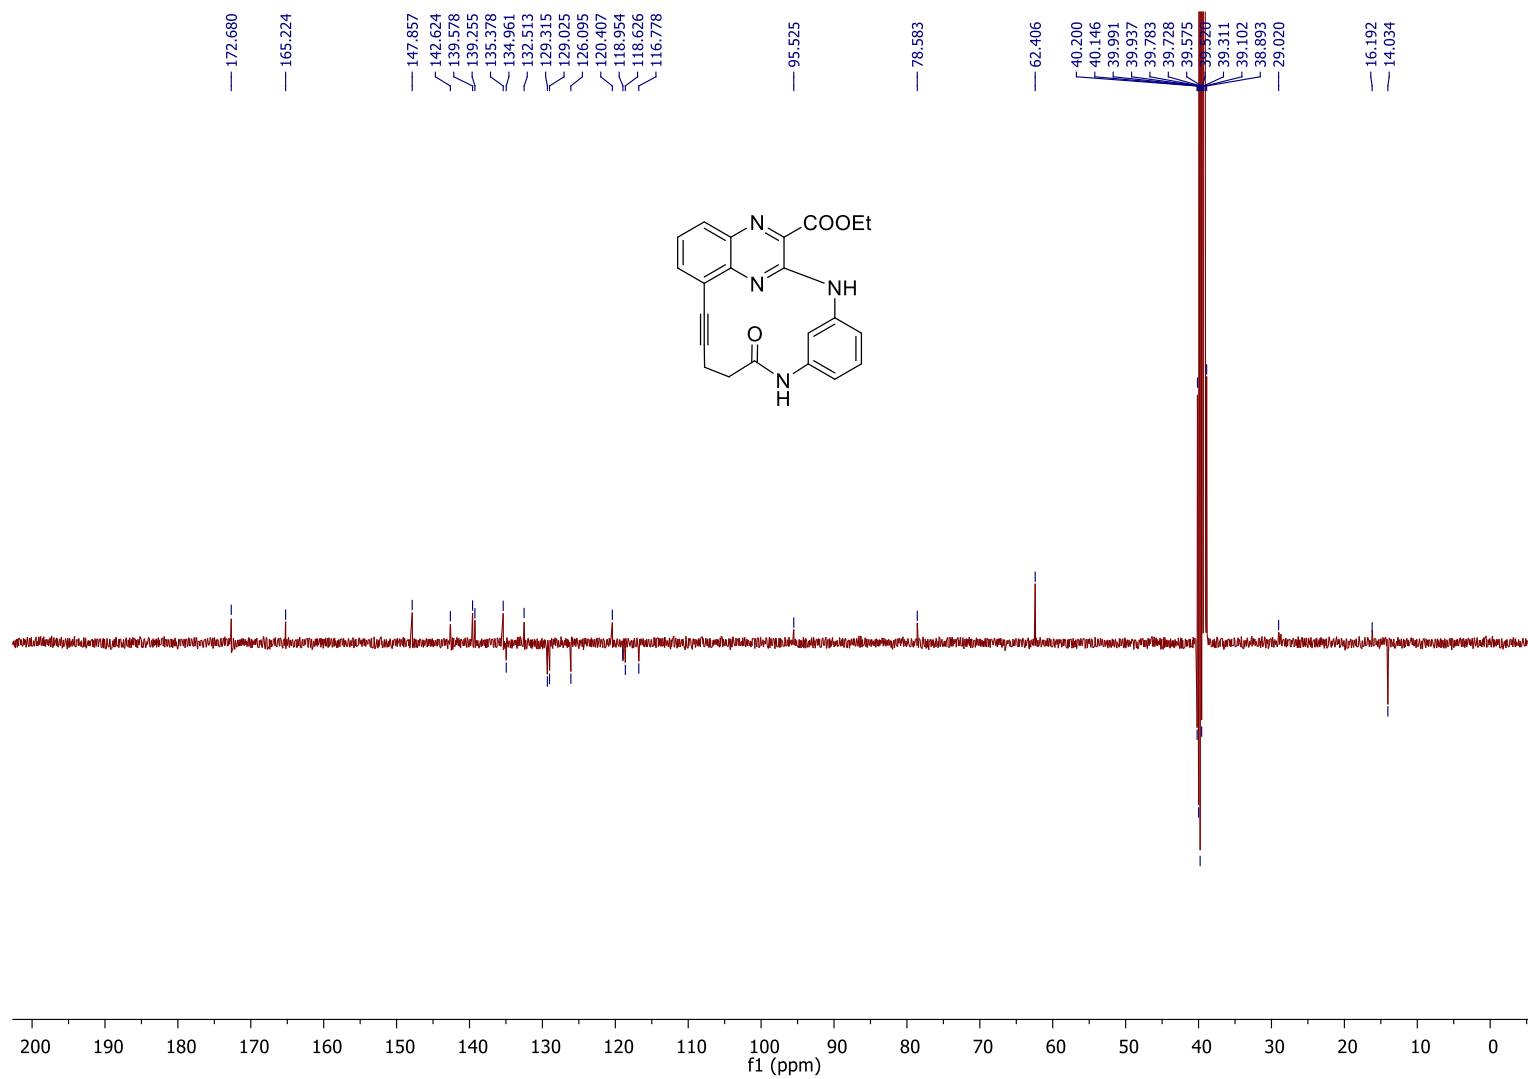

$^1\text{H}$  NMR of compound **8** in DMSO- $d_6$

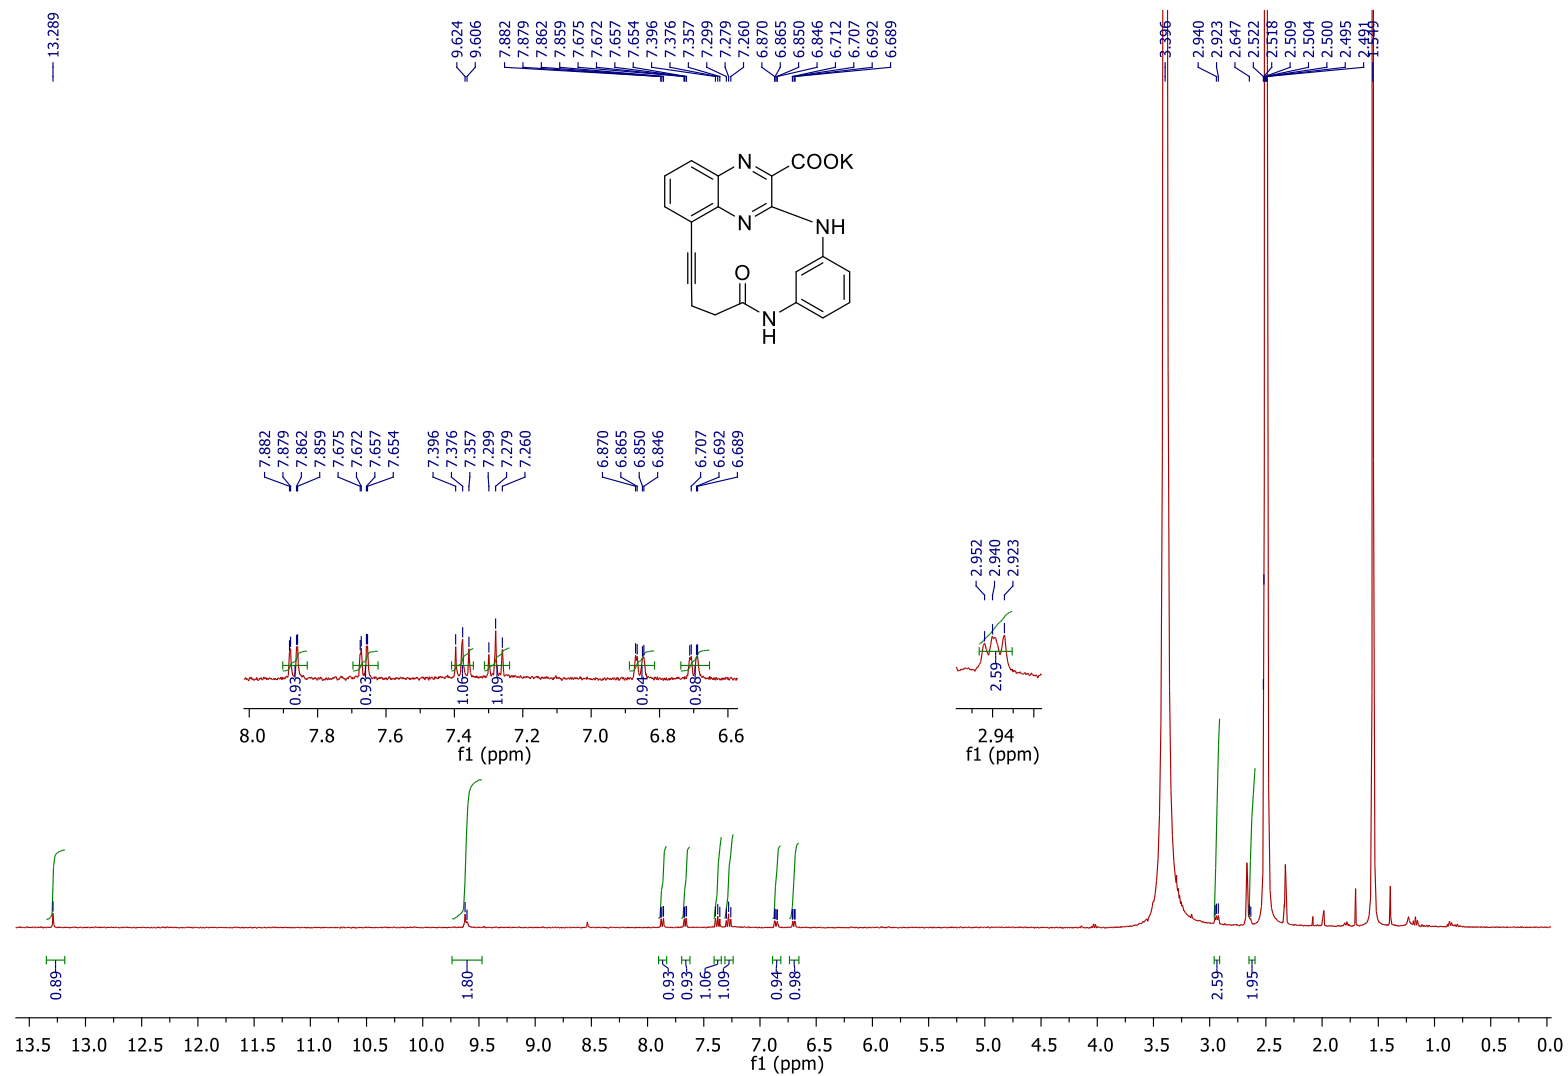

## 2. HRMS spectra

### HRMS spectrum of compound 7

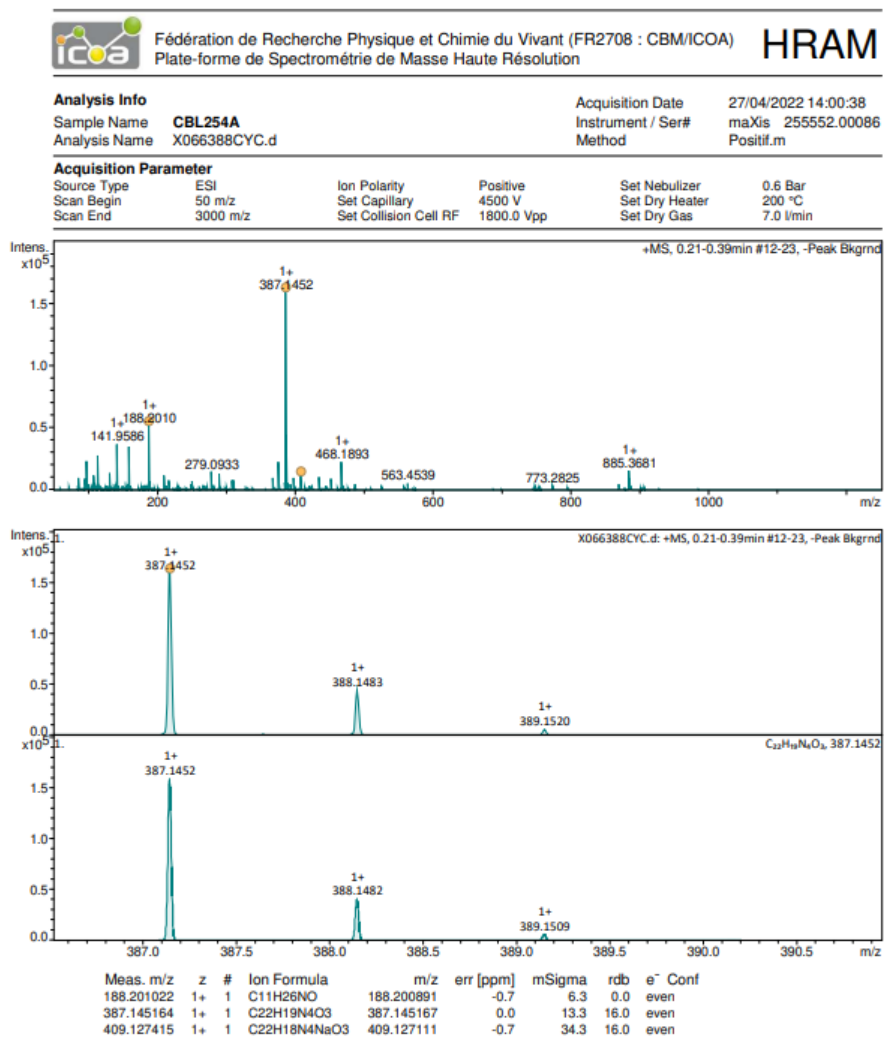

## HRMS spectrum of compound 8

|                      |                    |                   |                     |
|----------------------|--------------------|-------------------|---------------------|
| <b>Analysis Info</b> |                    | Acquisition Date  | 06/07/2022 12:14:30 |
| Sample Name          | <b>CBL323b</b>     | Instrument / Ser# | maXis 255552.00086  |
| Analysis Name        | X067719CYC_13073.d | Method            | Positif.m           |

|                              |          |                       |            |                |           |
|------------------------------|----------|-----------------------|------------|----------------|-----------|
| <b>Acquisition Parameter</b> |          |                       |            |                |           |
| Source Type                  | ESI      | Ion Polarity          | Positive   | Set Nebulizer  | 0.6 Bar   |
| Scan Begin                   | 50 m/z   | Set Capillary         | 4500 V     | Set Dry Heater | 200 °C    |
| Scan End                     | 3000 m/z | Set Collision Cell RF | 1800.0 Vpp | Set Dry Gas    | 7.0 l/min |

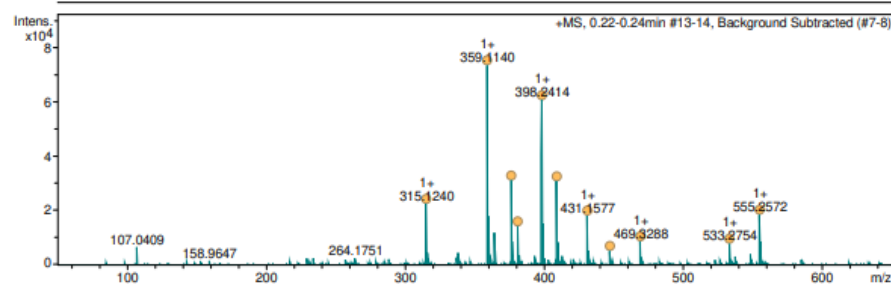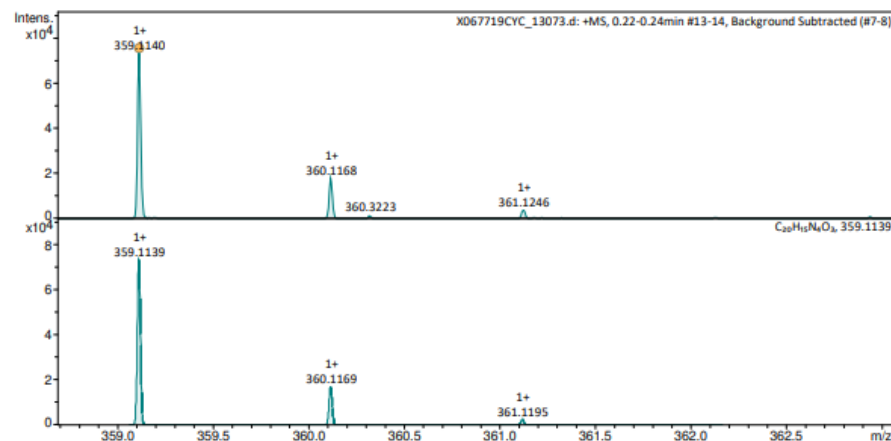

| Meas. m/z  | z  | # | Ion Formula  | m/z        | err [ppm] | mSigma | rdb  | e <sup>-</sup> | Conf |
|------------|----|---|--------------|------------|-----------|--------|------|----------------|------|
| 315.124029 | 1+ | 1 | C19H15N4O    | 315.124038 | 0.0       | 14.8   | 15.0 | even           |      |
| 359.114011 | 1+ | 1 | C20H15N4O3   | 359.113867 | -0.4      | 12.9   | 16.0 | even           |      |
| 376.259804 | 1+ | 1 | C21H34N3O3   | 376.259468 | -0.9      | 22.5   | 7.0  | even           |      |
| 381.095904 | 1+ | 1 | C20H14N4NaO3 | 381.095811 | -0.2      | 26.9   | 16.0 | even           |      |
| 398.241419 | 1+ | 1 | C21H33N3NaO3 | 398.241413 | -0.0      | 4.8    | 7.0  | even           |      |
| 409.175862 | 1+ | 1 | C23H25N2O5   | 409.175798 | -0.2      | 9.5    | 13.0 | even           |      |
| 431.157745 | 1+ | 1 | C23H24N2NaO5 | 431.157743 | -0.0      | 15.7   | 13.0 | even           |      |
| 447.346736 | 1+ | 1 | C28H47O4     | 447.346886 | 0.3       | 109.5  | 6.0  | even           |      |
